# Supplementary material for: A colorimetric and fluorescent sensor for water in acetonitrile based on intramolecular charge transfer: D–(π–A)2-type pyridine–boron trifluoride complex
Source: Royal Society of Chemistry journal article supplement (doi:10.1039/c8cc06257a), 2018-01-01
Supplement: c8cc06257a1.pdf [file c8cc06257a1.pdf]

## Supplementary Information

### **Colorimetric and fluorescent sensor for water in acetonitrile based on intramolecular charge transfer: D-( $\pi$ -A)<sub>2</sub>-type pyridine-boron trifluoride complex**

Shuhe Tsumura, Toshiaki Enoki and Yousuke Ooyama\*

*Department of Applied Chemistry, Graduate School of Engineering, Hiroshima University, Higashi-Hiroshima, 739-8527, Japan.*

*Fax: +81 824 24 5494; Tel: +81 824 24 7689; E-mail:yooyama@hiroshima-u.ac.jp*

## Experimental Section:

### General:

IR spectra were recorded on a PerkinElmer Spectrum One FT-IR spectrometer using ATR method.  $^1\text{H}$  and  $^{11}\text{B}$  NMR spectra were recorded on a Varian-500 FT NMR spectrometer. High-resolution mass spectral data by ESI were acquired on a Thermo Fisher Scientific LTQ Orbitrap XL. Thermogravimetry-differential thermal analysis (TG-DTA) was performed by SII EXSTRA TG/DTA6200. Photoabsorption spectra were observed with a SHIMADZU UV-3150 spectrophotometer. Fluorescence spectra were measured with a Hitachi F-4500 spectrophotometer. The fluorescence quantum yields were determined by a HORIBA FluoroMax-4 spectrofluorometer by using a calibrated integrating sphere system. The addition of water to organic solvents containing **YNI-2-BF<sub>3</sub>** was made by weight percent (wt%). The determination of water in acetonitrile was done with a MKC-610 and MKA-610 Karl Fischer moisture titrator (Kyoto Electronics manufacturing Co., Ltd.) based on Karl Fischer coulometric titration for below 1.0 wt% and volumetric titration for 1.0-40 wt%, respectively.

### Preparation of 9-butyl-3,6-bis(5-(pyridin-4-yl)thiophen-2-yl)-9H-carbazole-boron trifluoride complex (**YNI-2-BF<sub>3</sub>**)

To a solution of **YNI-2** (0.1 g, 0.185 mmol) in THF (40 ml) under a nitrogen atmosphere was added dropwise 47%  $\text{BF}_3\text{-OEt}_2$  (0.51 mmol) diluted with THF (5 ml) for 15 min, and then the solution was stirred for 2.5 h at room temperature. The resulting precipitate was filtered and was washed by THF to give **YNI-2-BF<sub>3</sub>** (0.05 g, yield 43 %) as a red solid; FT-IR (ATR):  $\nu = 1627$  (C=N str. for pyridyl group coordinated to  $\text{BF}_3$ ), 1422 (B-N str. for pyridine- $\text{BF}_3$  complex), 1023 (B-F str. for  $\text{BF}_3$ )  $\text{cm}^{-1}$ ;  $^1\text{H}$  NMR (500 MHz, acetonitrile- $d_3$ )  $\delta = 0.95$  (t,  $J = 7.4$  Hz, 3H), 1.37-1.42 (m, 2H), 1.87-1.88 (m, 2H), 4.43 (t,  $J = 7.2$  Hz, 2H), 7.65-7.68 (m, 4H), 7.92 (dd,  $J = 1.9$  and 8.6 Hz, 2H), 8.02-8.04 (m, 6H), 8.52 (d,  $J = 7.0$  Hz, 4H), 8.65 (d,  $J = 1.7$  Hz, 2H) ppm;  $^{11}\text{B}$ -NMR (160 MHz, acetonitrile- $d_3$ )  $\delta = -0.975$  ppm; HRMS (ESI):  $m/z$  (%): $[\text{M}+\text{H}^+]$  calcd for  $\text{C}_{34}\text{H}_{28}\text{N}_3\text{S}_2$ , 542.17192; found 542.17200.

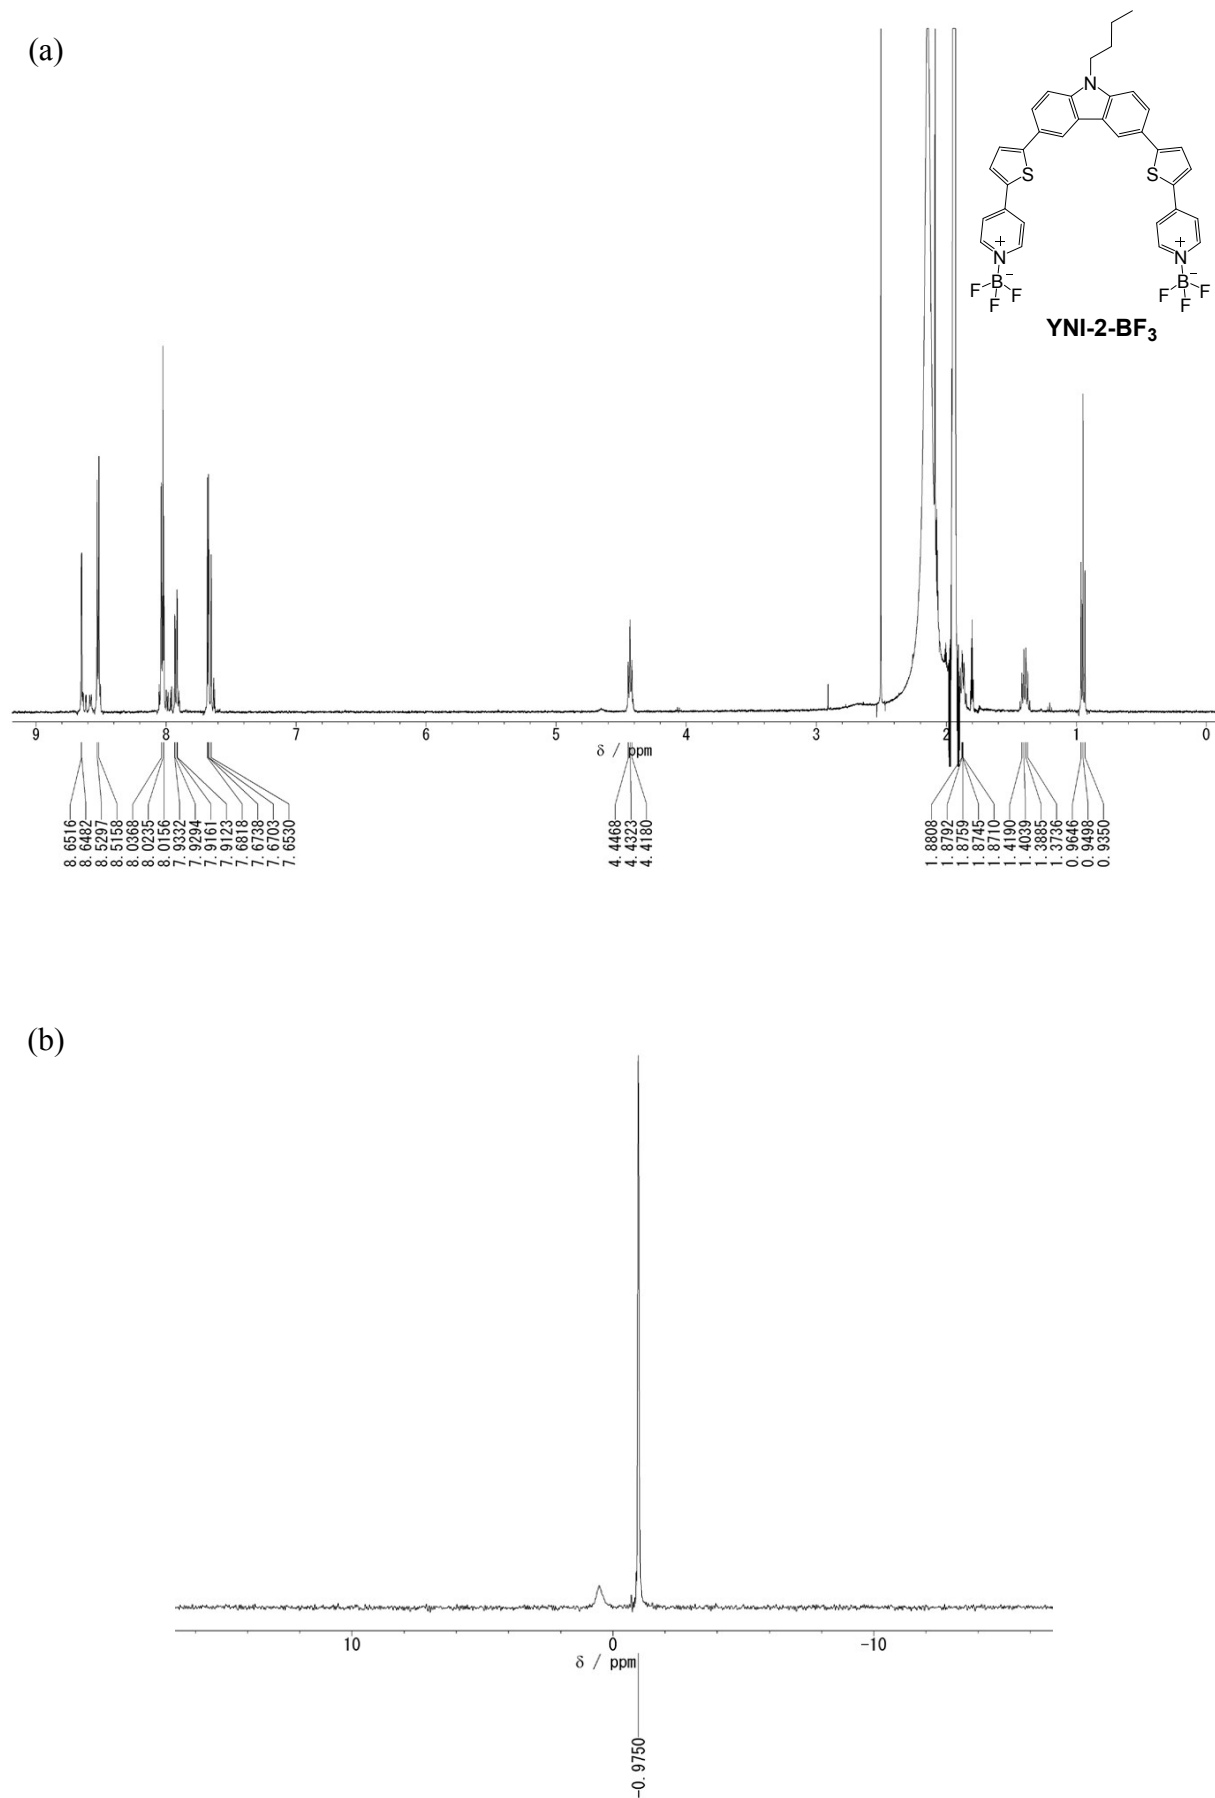

**Fig. S1** (a) <sup>1</sup>H NMR (500 MHz) and (b) <sup>11</sup>B NMR (160 MHz) spectra of **YNI-2-BF<sub>3</sub>** in acetonitrile-d<sub>3</sub>.

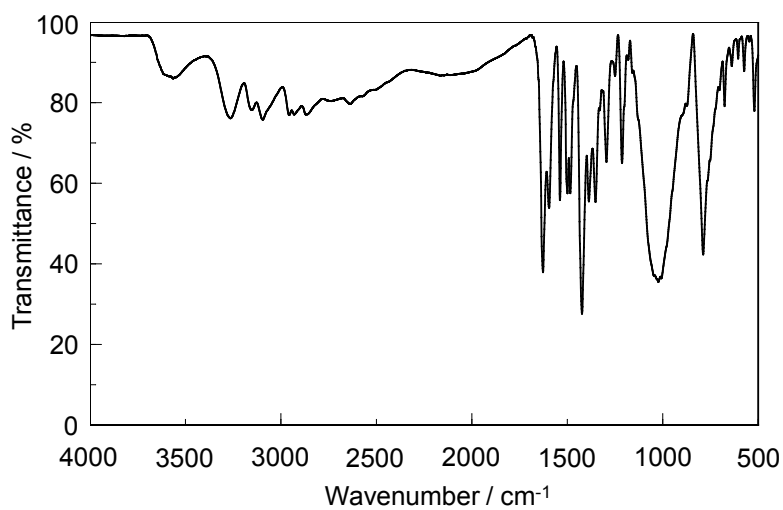

**Fig. S2** FTIR spectrum of **YNI-2-BF<sub>3</sub>**.

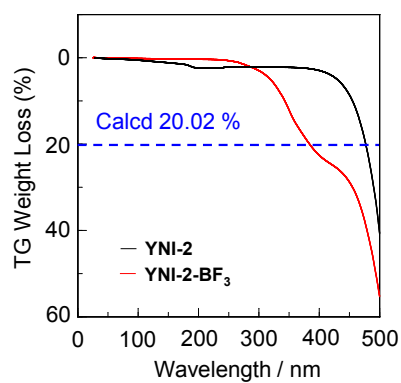

**Fig. S3** TG curves for **YNI-2** and **YNI-2-BF<sub>3</sub>** at a heating rate 10 °C min<sup>-1</sup>. Calculated weight loss for the release of two BF<sub>3</sub> units from **YNI-2-BF** to form **YNI-2** is 20.02 %.

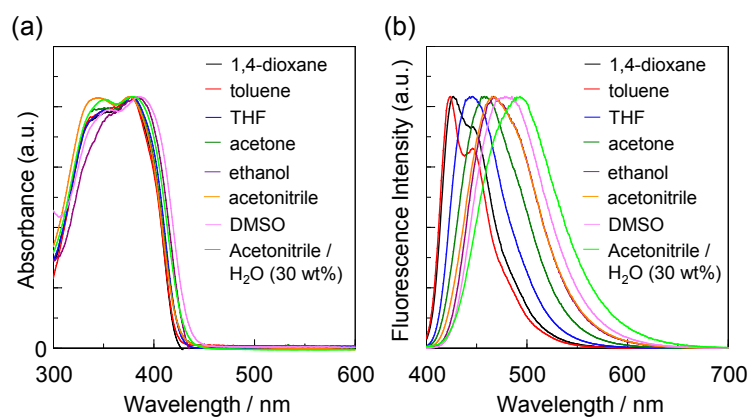

**Fig. S4** (a) photoabsorption and (b) fluorescence ( $\lambda_{\text{ex}} = 375\text{-}385$  nm) spectra of **YNI-2** in various solvents.

**Table S1** Optical data of **YNI-2** in various solvents

| Solvent                                  | $\epsilon_r$ | $\lambda_{\text{max}}^{\text{abs}} / \text{nm}$ | $\lambda_{\text{max}}^{\text{fl}} / \text{nm}$ | $\Phi_{\text{fl}}$ |
|------------------------------------------|--------------|-------------------------------------------------|------------------------------------------------|--------------------|
| 1,4-dioxane                              | 2.21         | 376                                             | 427                                            | 0.52               |
| toluene                                  | 2.38         | 378                                             | 424                                            | 0.41               |
| THF                                      | 7.58         | 378                                             | 448                                            | 0.67               |
| acetone                                  | 20.6         | 377                                             | 458                                            | 0.63               |
| ethanol                                  | 24.6         | 384                                             | 467                                            | 0.46               |
| acetonitrile                             | 35.9         | 375                                             | 465                                            | 0.60               |
| DMSO                                     | 46.5         | 385                                             | 478                                            | 0.87               |
| acetonitrile / H <sub>2</sub> O (30 wt%) | 46.8         | 379                                             | 493                                            | 0.16               |

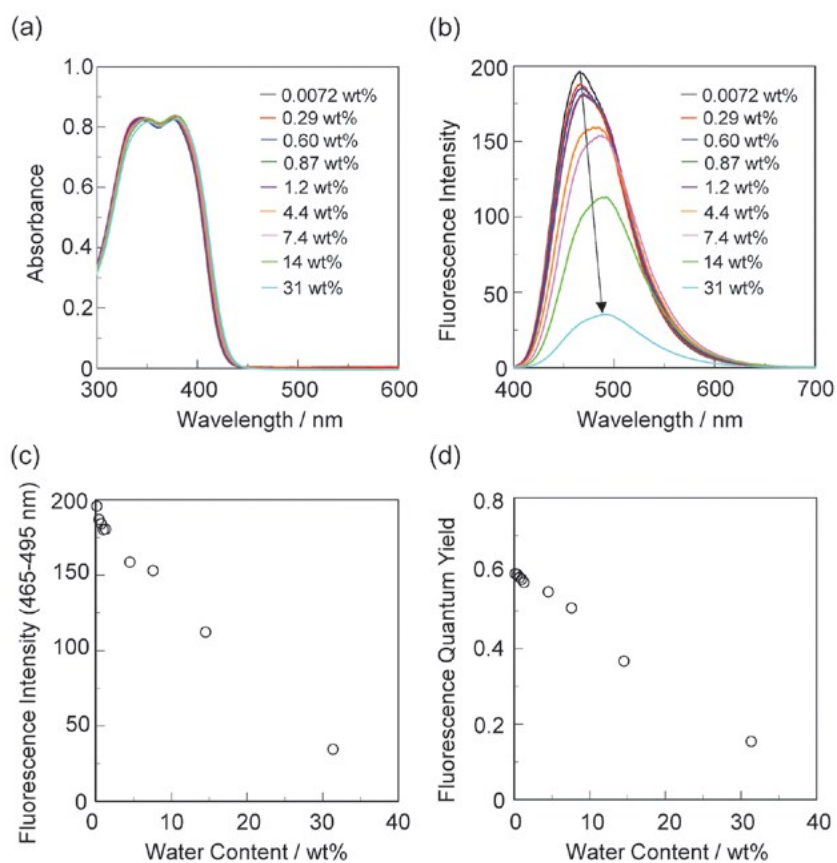

**Fig. S5** (a) Photoabsorption and (b) fluorescence spectra of **YNI-2** ( $c = 2.0 \times 10^{-5}$  M) by photoexcitation at 375–380 nm in acetonitrile containing water content of 0.0072–31 wt%. (c) Fluorescence peak intensity at 465–495 nm by photoexcitation at 375–380 nm and (d) fluorescence quantum yield of **YNI-2** by photoexcitation at 376 nm as a function of water content (0.0072–31 wt%) in acetonitrile.
